# Supplementary material for: Controllable synthesis of hydrangea-like NixSy hollow microflower all-solid-state asymmetric supercapacitor electrodes with enhanced performance by the synergistic effect of multiphase nickel
Source: Royal Society of Chemistry journal article supplement (doi:10.1039/d1ce00526j), 2021-01-01
Supplement: d1ce00526j1.pdf [file d1ce00526j1.pdf]

Supporting information:

**Controllable synthesis of hydrangea-like  $\text{Ni}_x\text{S}_y$  hollow microflowers  
all-solid-state asymmetric supercapacitor electrodes with enhanced  
performance by synergistic effect of nickel multiphase**

Lingli Cheng<sup>1,\*</sup>, Xiaoxiao Feng<sup>1</sup>, Jiaqi Wang<sup>1</sup>, Shaqi Fu<sup>1</sup>, Zhen Li<sup>2,\*</sup>, Zheng Jiao<sup>2</sup>

1. *School of Environmental and Chemical Engineering, Shanghai University, Shanghai, 200444, P.R. China*
2. *Shanghai Applied Radiation Institute, Shanghai University, Shanghai 201800, PR China*

---

\* Corresponding author:

Lingli Cheng, *Email:* chenglingli@t.shu.edu.cn, Tel./fax: +86 21 66136229.

Zhen Li, *Email:* lizhen@shu.edu.cn, Tel./fax: +86 21 66135160.

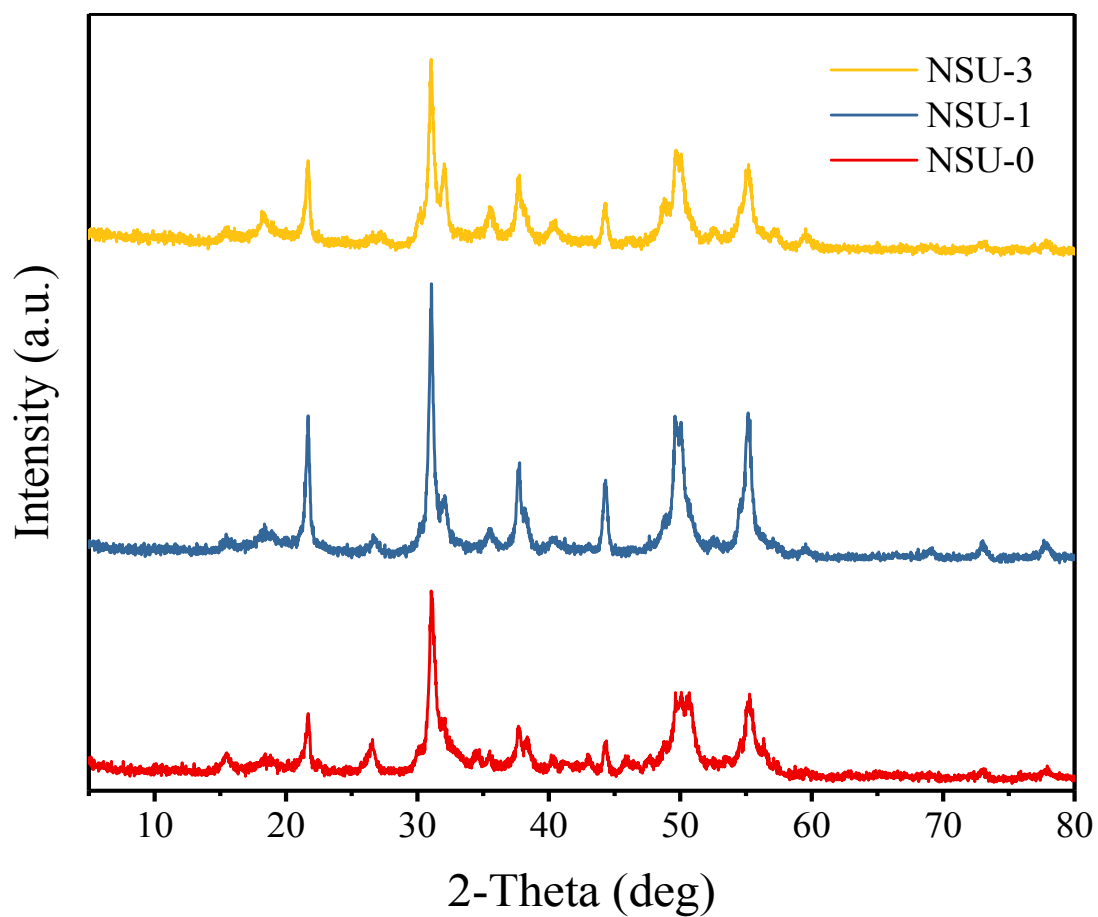

**Figure S1.** XRD patterns of NSU-0, NSU-1 and NSU-3.

**Table S1.** The amount of every phase of mixed phases.

| Sample | Amount<br>of urea, mmol | Percentage<br>content of $\text{Ni}_3\text{S}_2$ | Percentage<br>content of NiS | Percentage<br>content of $\text{Ni}_3\text{S}_4$ |
|--------|-------------------------|--------------------------------------------------|------------------------------|--------------------------------------------------|
| NSU-0  | 0                       | 50.5%                                            | 15.8%                        | 33.7%                                            |
| NSU-1  | 1                       | 65.0%                                            | 13.0%                        | 22.0%                                            |
| NSU-2  | 2                       | 57.6%                                            | 20.2%                        | 22.2%                                            |
| NSU-3  | 3                       | 62.0%                                            | 15.0%                        | 23.0%                                            |

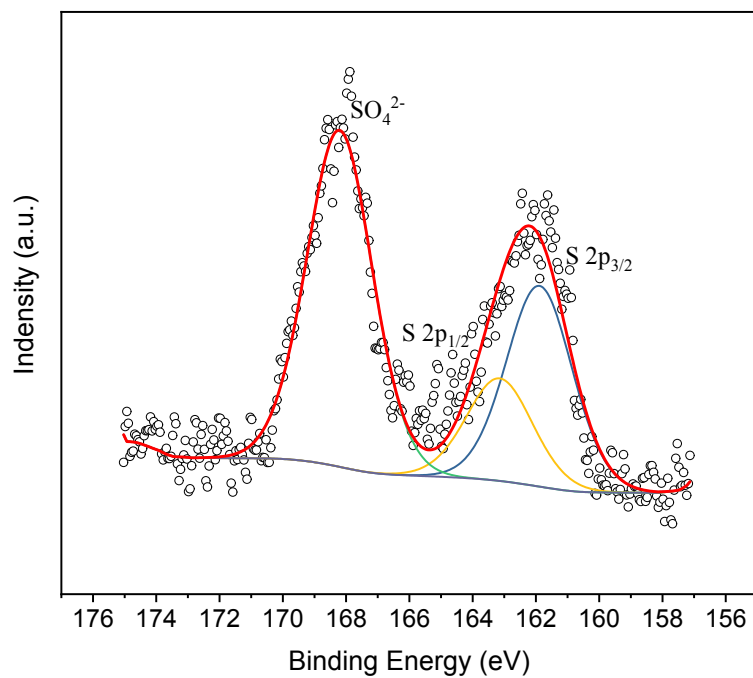

**Figure S2.** S 2p spectra of NSU-2.

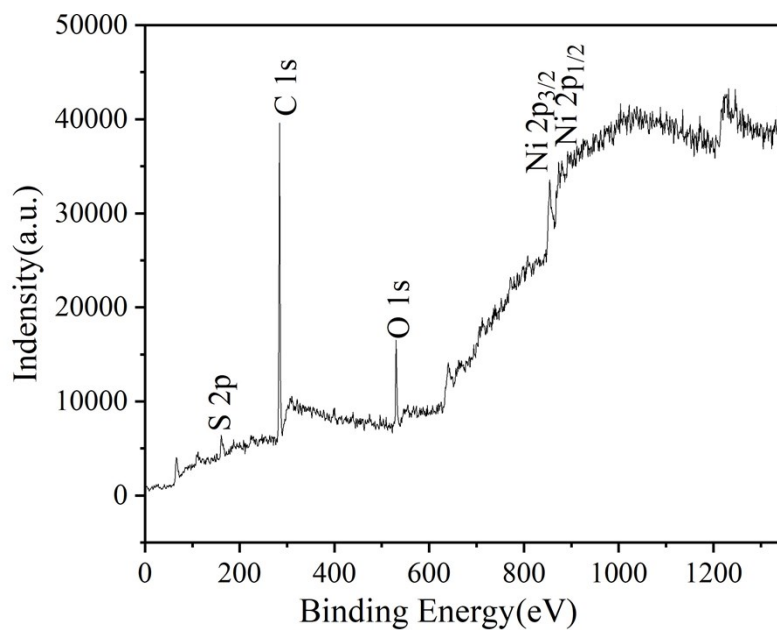

**Figure S3.** The full survey spectrum of NSU-2.

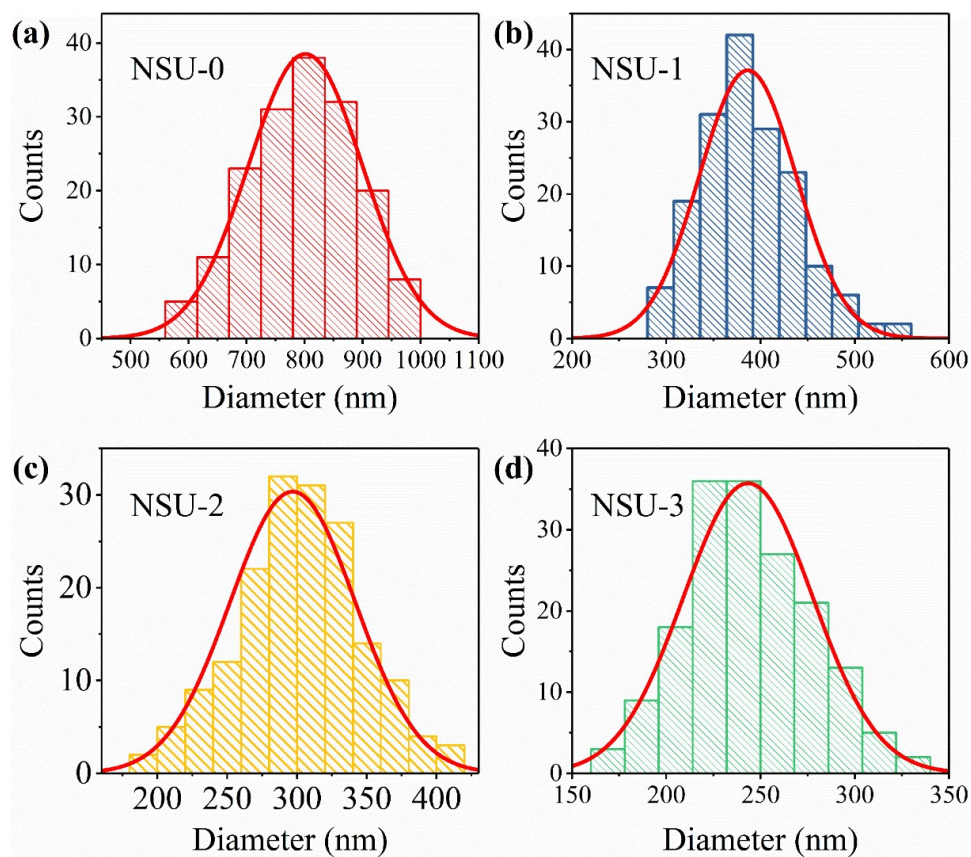

**Figure S4.** Diameter distribution histogram of NSU-0(a), NSU-1(b), NSU-2(c) and NSU-3(d).

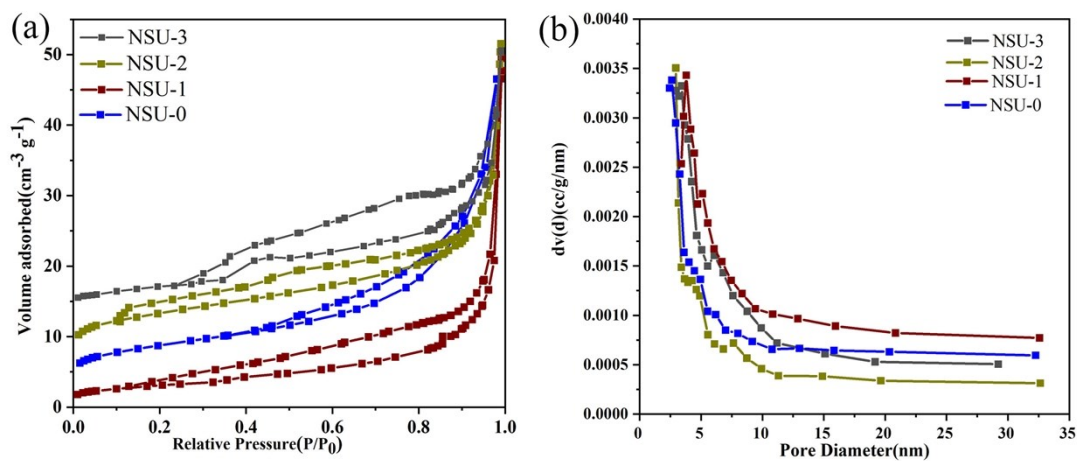

**Figure S5.** (a)  $N_2$  adsorption/desorption isotherms of NSUs samples; (b) pore size distributions of NSUs samples.

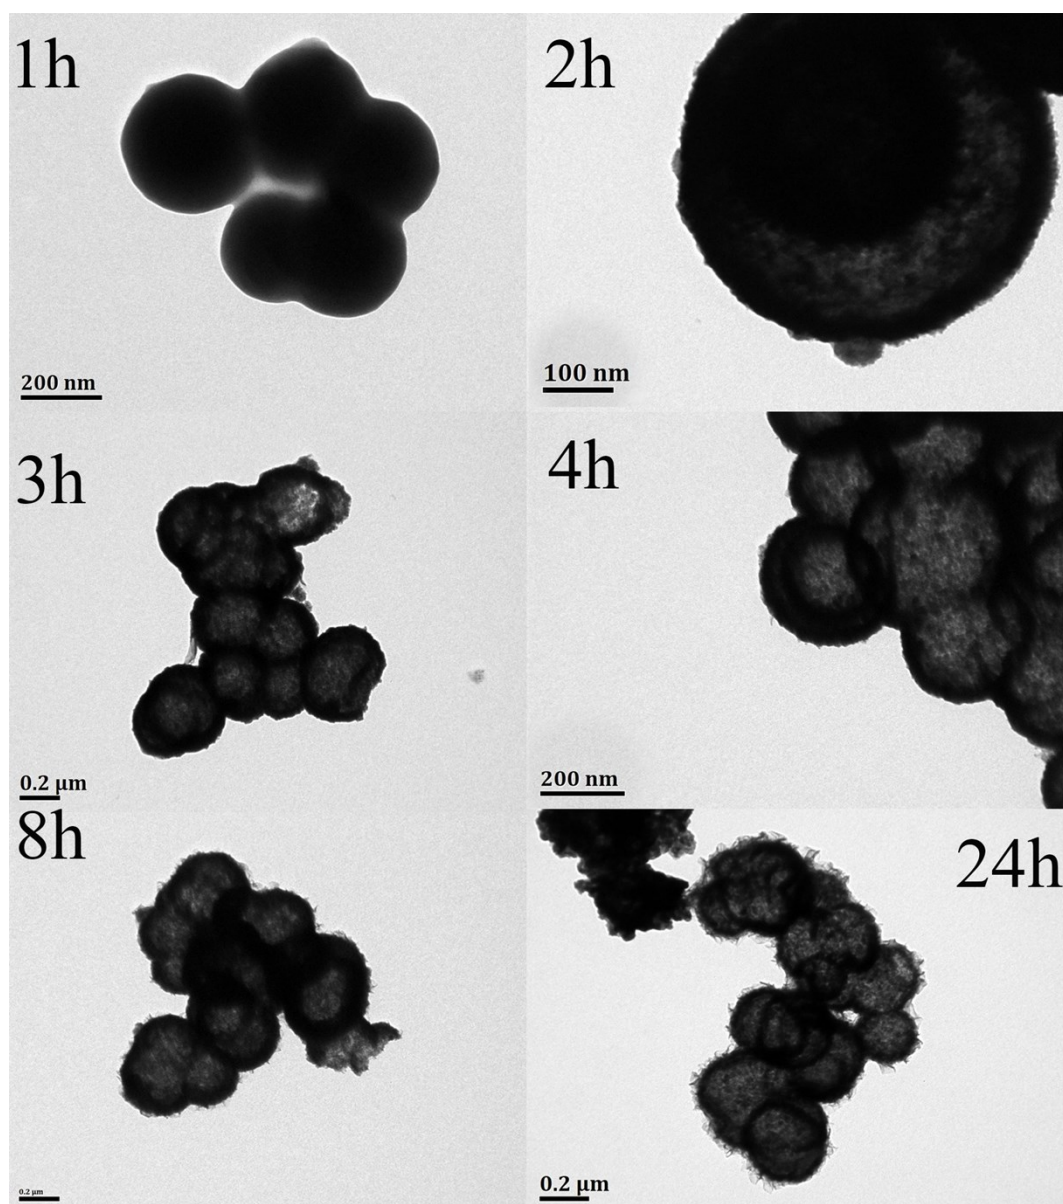

**Figure S6.** TEM images of NSUs after 1, 2, 3, 4, 8 and 24h, respectively.

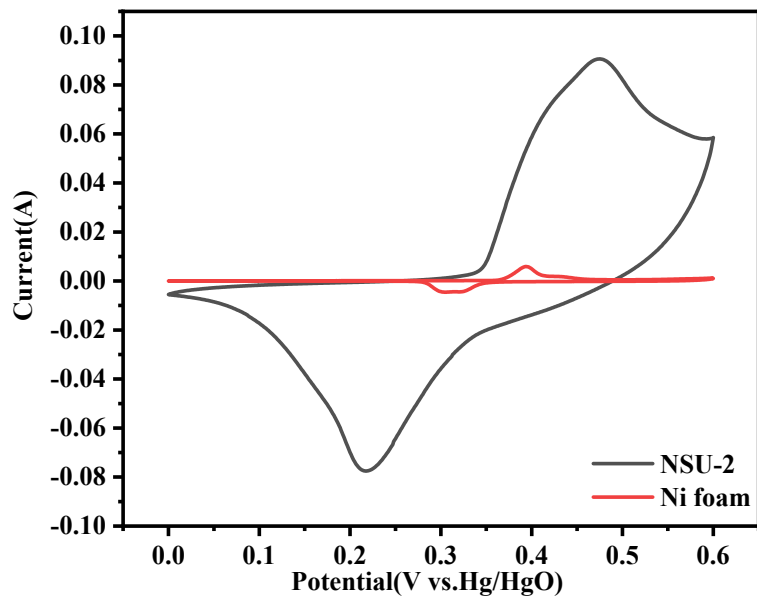

**Figure S7.** CV curve of nickel foam and NSU-2 at  $10 \text{ mV}\cdot\text{s}^{-1}$ .

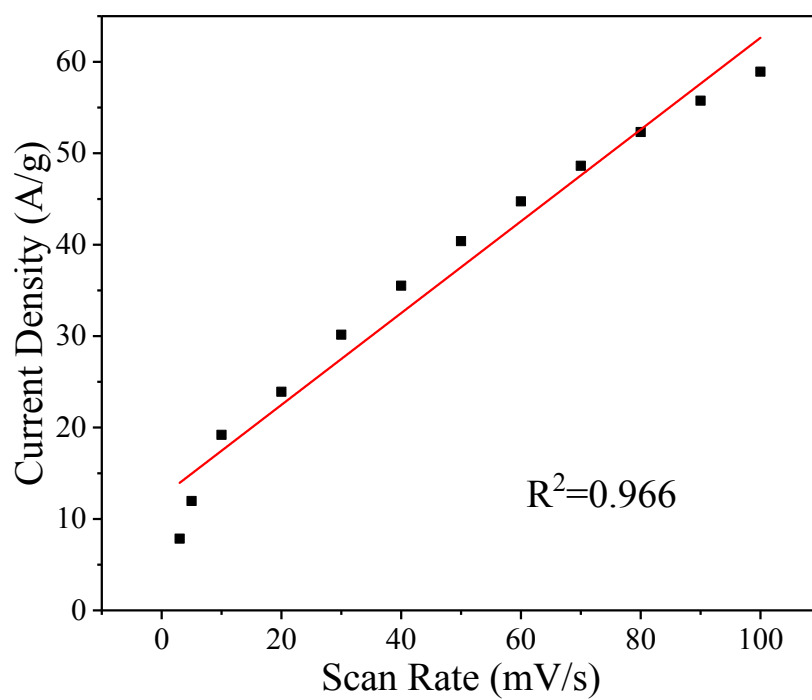

**Figure S8.** The  $i_p$  vs.  $V$  plots of NSU-2 electrode.

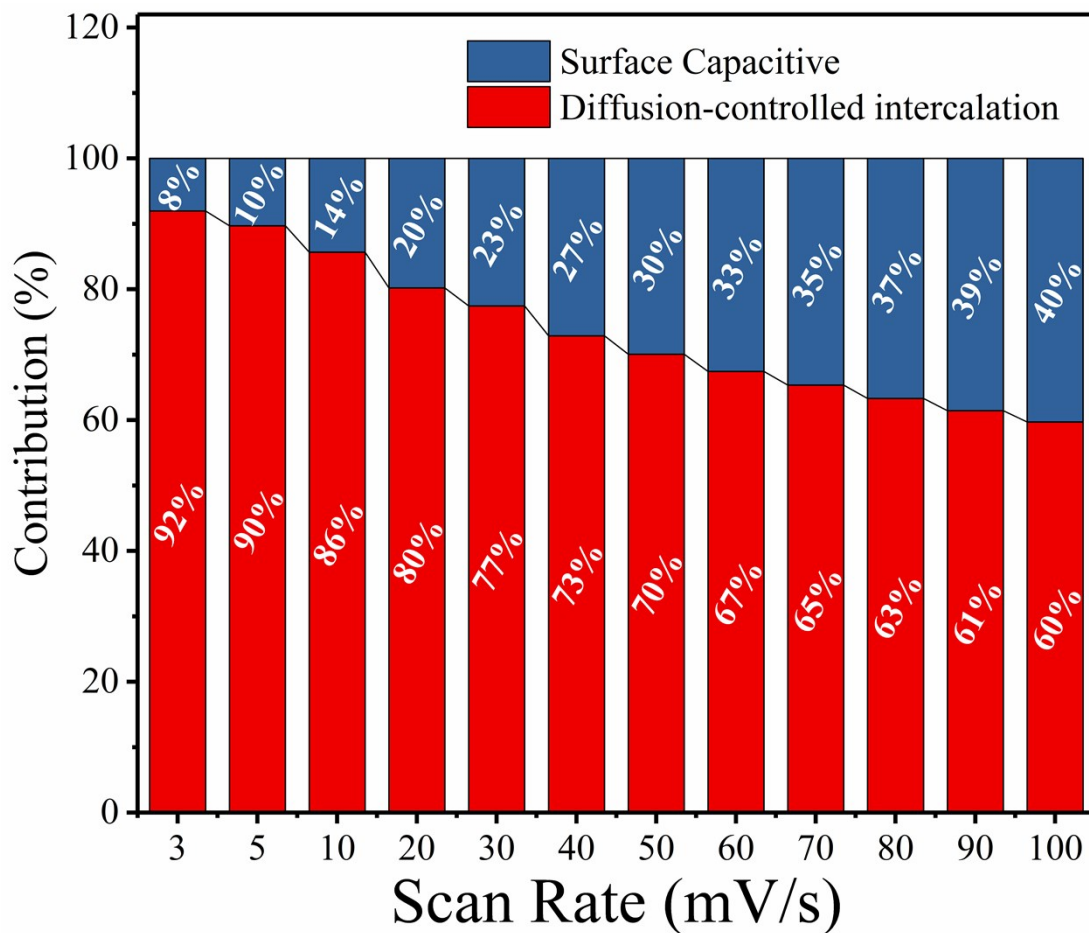

**Figure S9.** Surface capacitive effects and the diffusion-controlled intercalation process contribution of NSU-2 electrode at various scan rates.

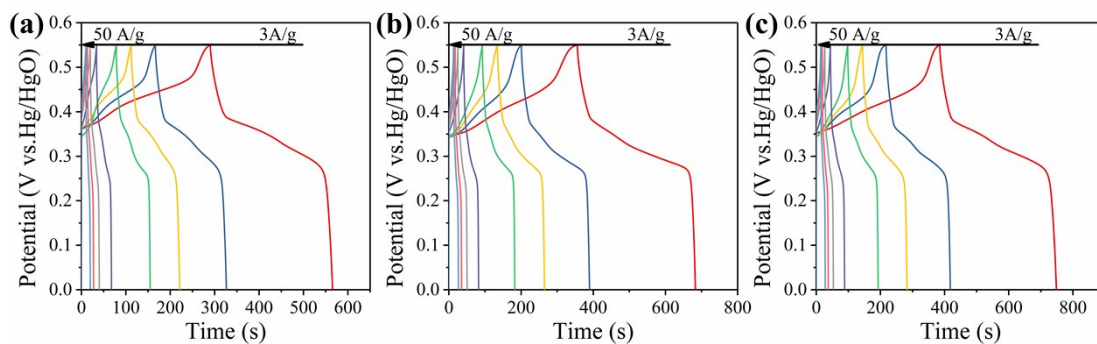

**Figure S10.** GCD curves of the NHU-0 (a), NHU-1 (b) and NHU-3 (c) at different current density.

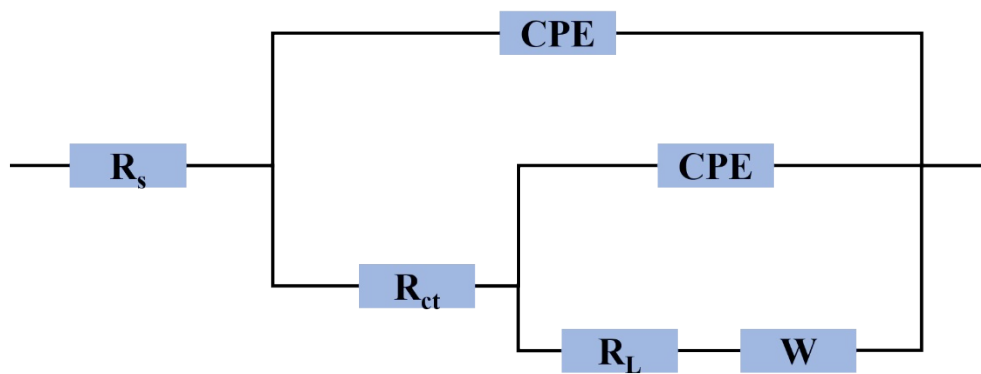

**Figure S11.** Corresponding equivalent circuit in EIS.

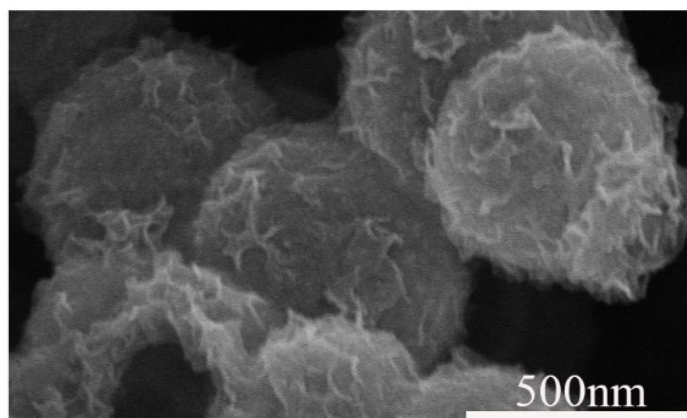

**Figure S12.** SEM of NSU-2 after 6000 cycles long-term stability test



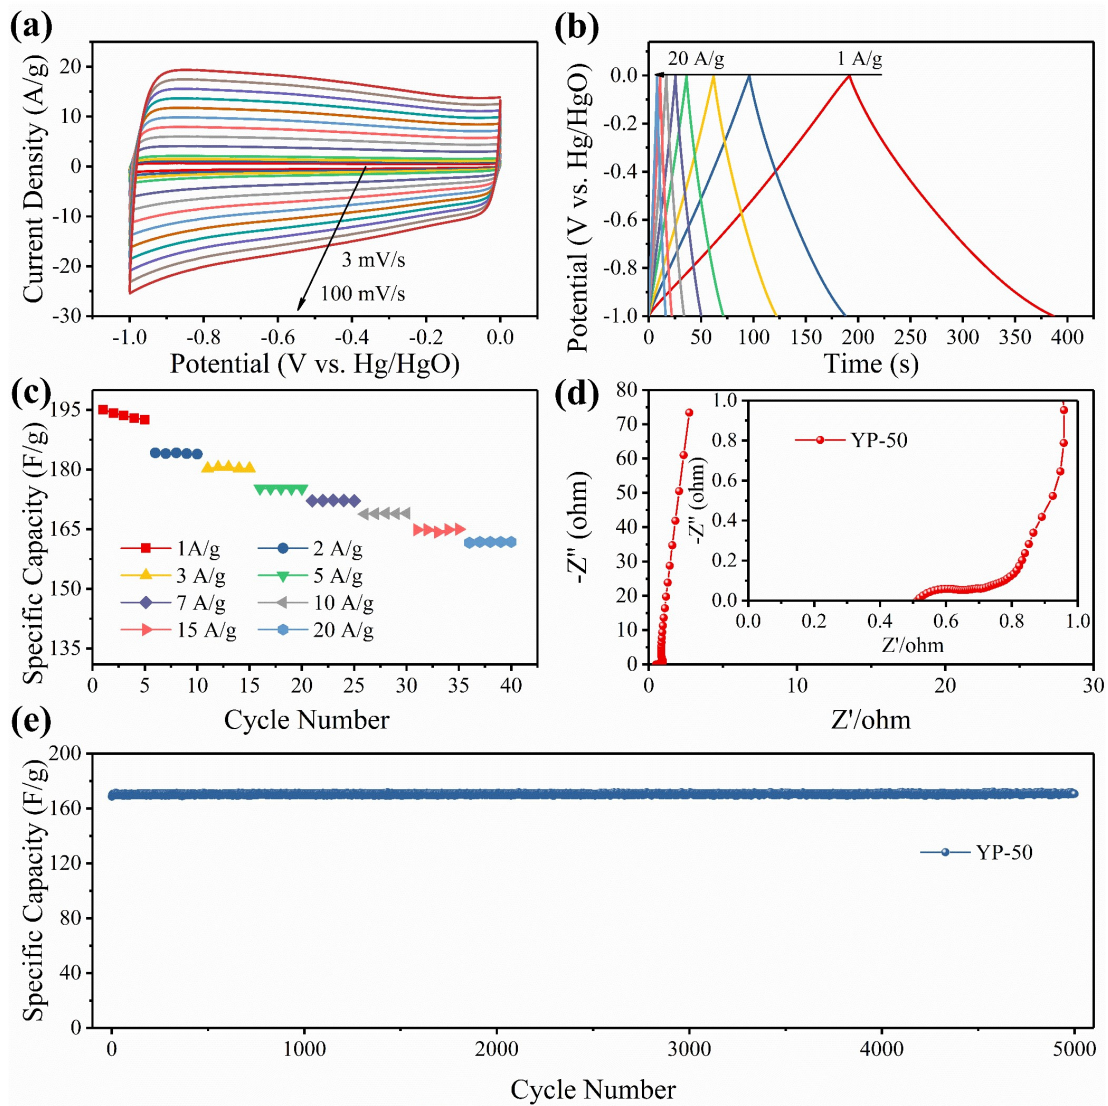

**Figure S13.** (a) CV curves of YP-50 at different scan rate, (b) GCD curves of YP-50 at different current density from 1 to 20  $\text{A}\cdot\text{g}^{-1}$ , (c) the corresponding specific capacitance of the YP-50 electrode (d) Nyquist plot of and the YP-50 electrode (e) cycle stability of the YP-50 electrode at 10  $\text{A}\cdot\text{g}^{-1}$  current density.
